# Supplementary material for: Hydrogenated Boron Phosphide THz-Metamaterial-Based Biosensor for Diagnosing COVID-19: A DFT Coupled FEM Study
Source: MDPI journal article supplement (doi:10.3390/nano12224024), 2022-11-16
Supplement: s1 [file s1]

# Supporting Information

## Hydrogenated boron phosphide THz-metamaterial based biosensor for diagnosing COVID-19: A DFT coupled FEM study

Chunjian Tan<sup>1,2</sup>, Shaogang Wang<sup>1,2</sup>, Huiru Yang<sup>2</sup>, Qianming Huang<sup>2</sup>, Shizhen Li<sup>2</sup>, Xu Liu<sup>1,2</sup>, Huaiyu Ye<sup>2,\*</sup>,  
Guoqi Zhang<sup>1,\*</sup>

<sup>1</sup> Electronic Components, Technology and Materials, Delft University of Technology, 2628 CD Delft, The Netherlands

<sup>2</sup> Engineering Research Center of Integrated Circuits for Next-Generation Communications, Ministry of Education, School of Microelectronics, Southern University of Science and Technology, Shenzhen 518055, China

\* Correspondence: yehy@sustech.edu.cn and G.Q. Zhang@tudelft.nl

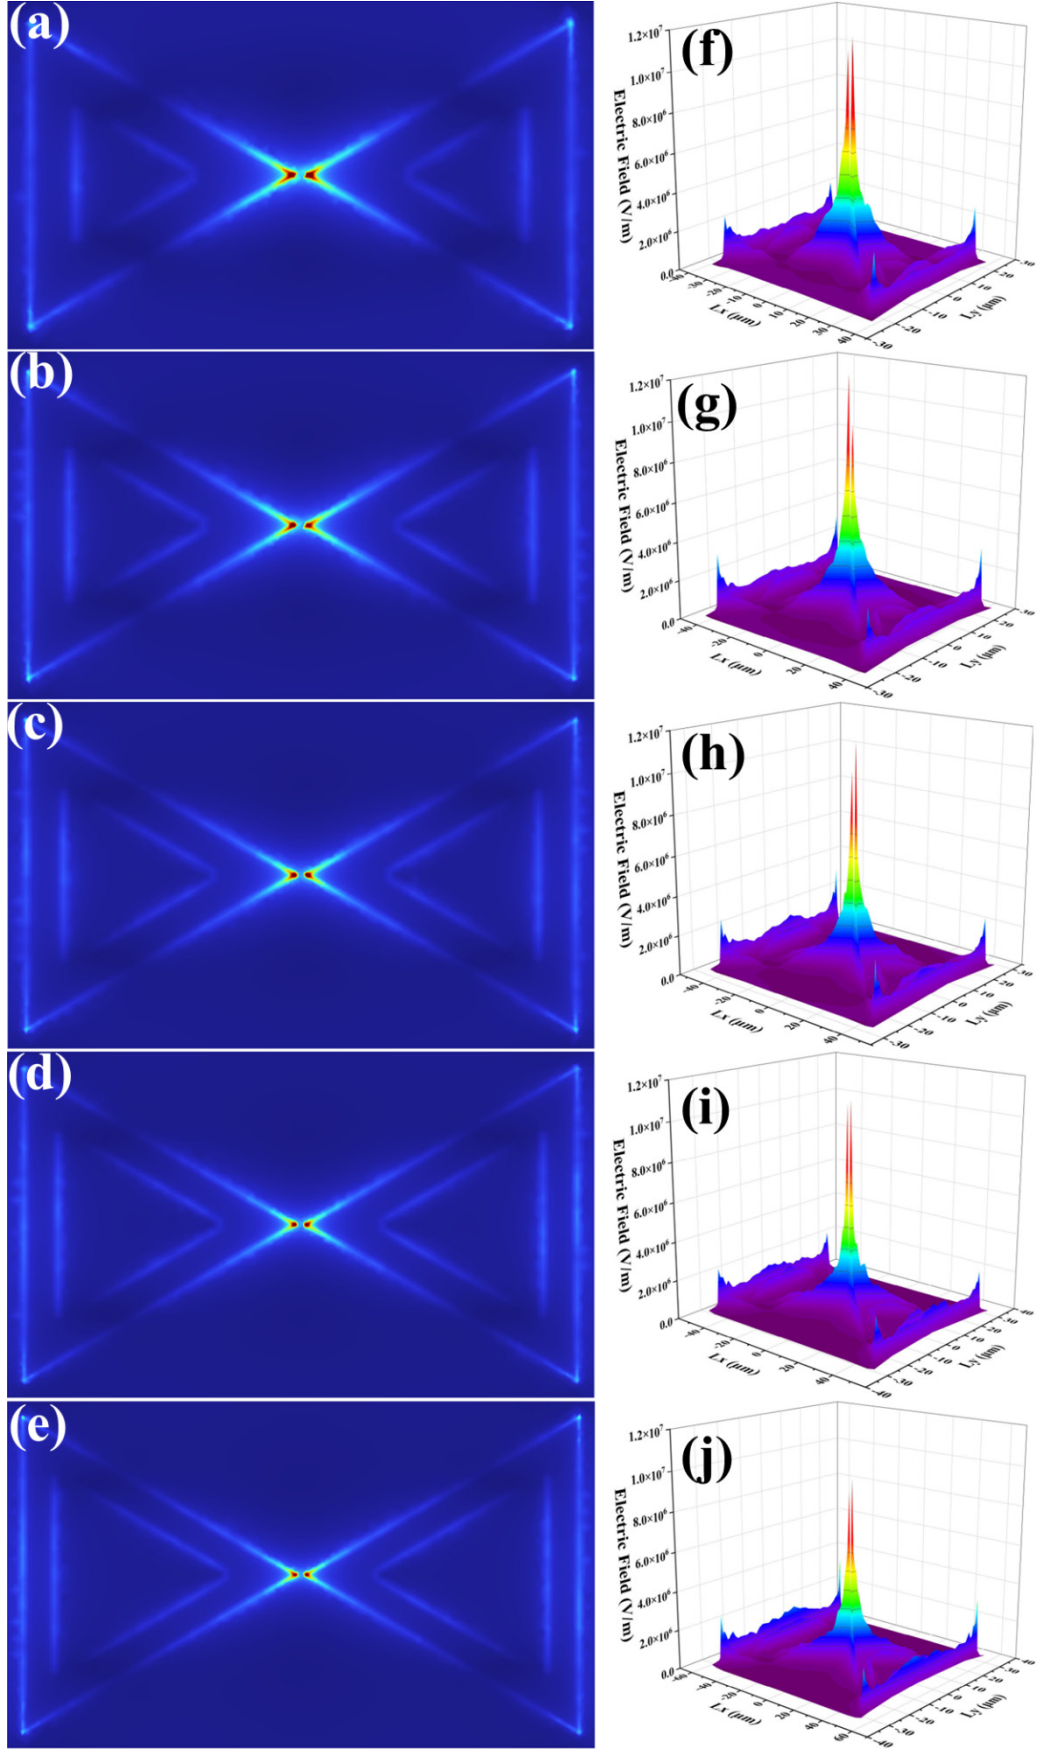

Figure S1. Distribution of electric field at the transmission valleys for different  $L_y$ . These valleys are

corresponded to the frequencies: (a) and (f) 1.69 THz for 40  $\mu\text{m}$ , (b) and (g) 1.46 THz for 45  $\mu\text{m}$ , (c) and (h) 1.27 THz for 50  $\mu\text{m}$ , (d) and (i) 1.12 THz for 55  $\mu\text{m}$ , (e) and (j) 0.99 THz for 60  $\mu\text{m}$ , respectively. Note that the rainbow range is set to 0 to  $8 \times 10^6$  to better observe the divergence of electric field between different  $L_y$ .

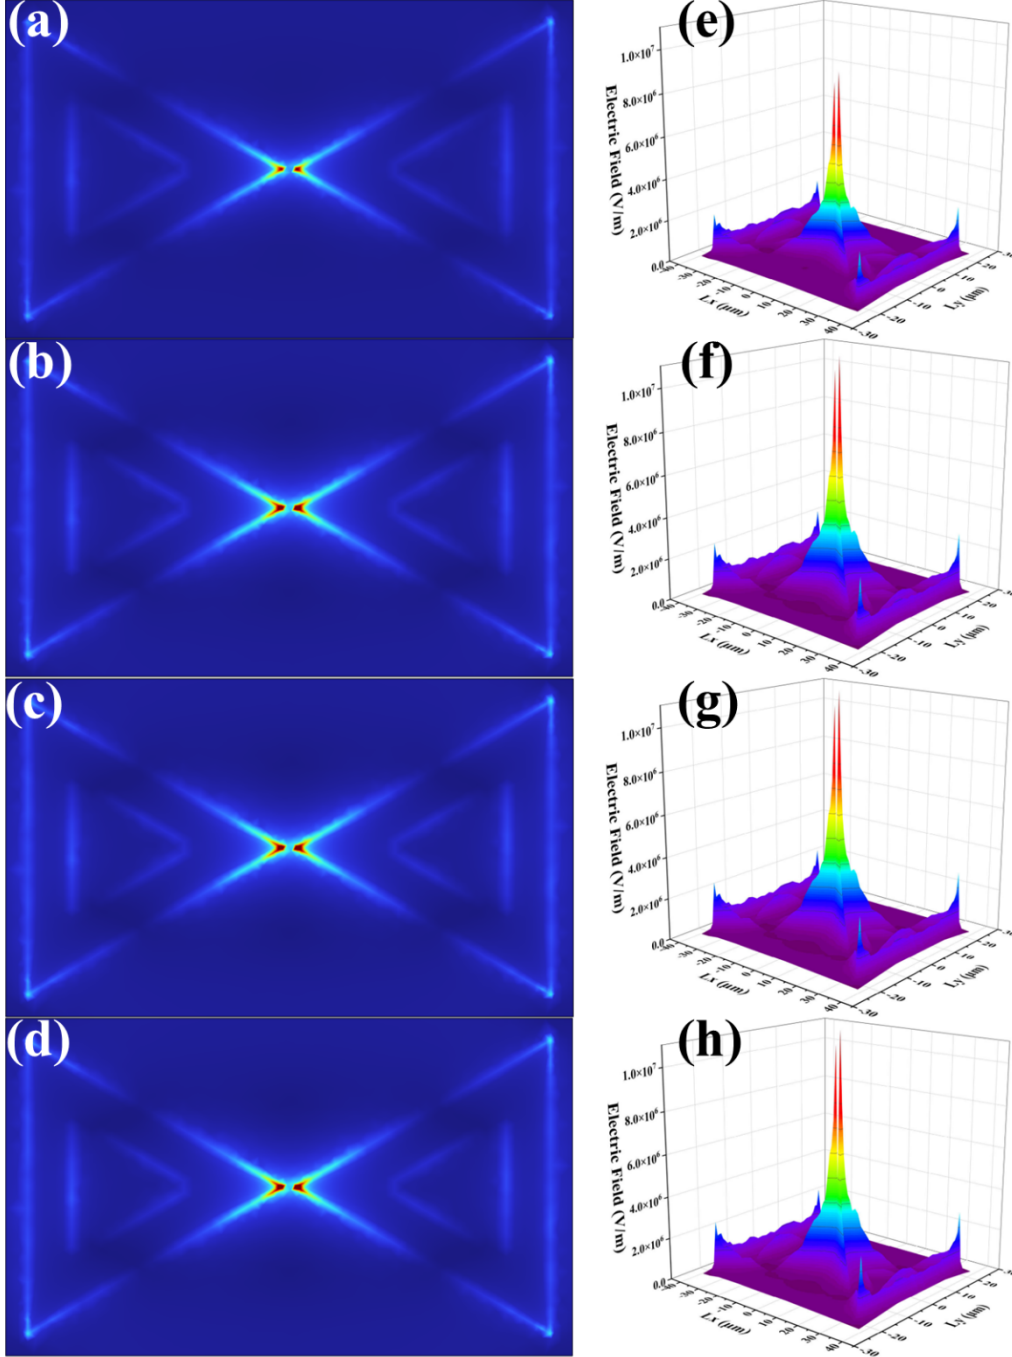

Figure S2. Distribution of electric field at the resonant frequencies for different carrier densities. (a) and (e) 1.61 THz for  $1 \times 10^{15} \text{ cm}^{-2}$ , (b) and (f) 1.68 THz for  $1 \times 10^{16} \text{ cm}^{-2}$ , (c) and (g) 1.69 THz for  $1 \times 10^{17} \text{ cm}^{-2}$ , (d) and (h) 1.69 THz for  $1 \times 10^{18} \text{ cm}^{-2}$ . The rainbow range is from 0 to  $8 \times 10^6$ .

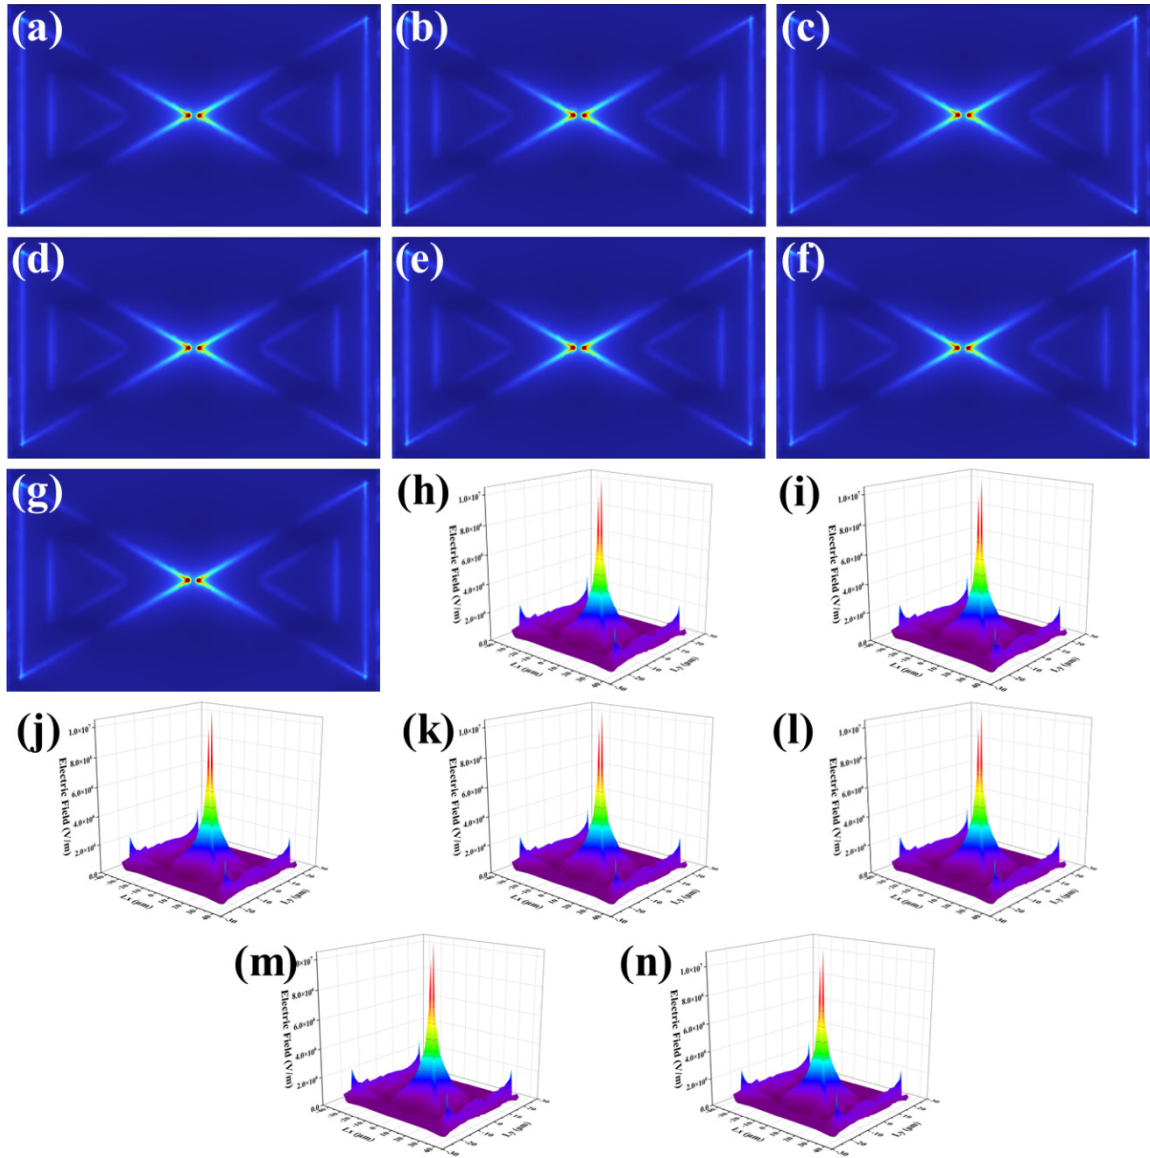

Figure S3. Distribution of electric field for the transmission valleys at different permittivity reduction. The rainbow is cut from 0 to  $8 \times 10^6$ . Notably, (a) and (h) normal blood, (b) and (i) 1% reduction, (c) and (j) 3% reduction, (d) and (k) 5% reduction, (e) and (l) 7% reduction, (f) and (m) 9% reduction, (g) and (n) 11% reduction.
